# Supplementary material for: miR-221-5p regulates proliferation and migration in human prostate cancer cells and reduces tumor growth in vivo
Source: PubMed Central journal article supplement (PMC6593572; doi:10.1186/s12885-019-5819-6), 2019-06-25

72h

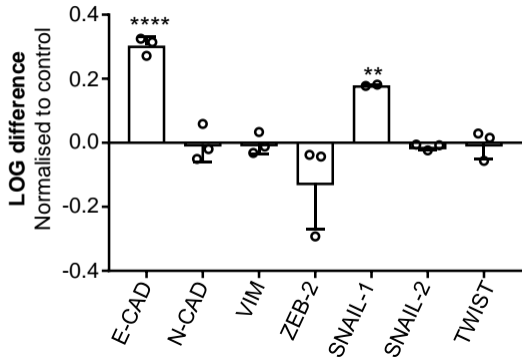

2 weeks

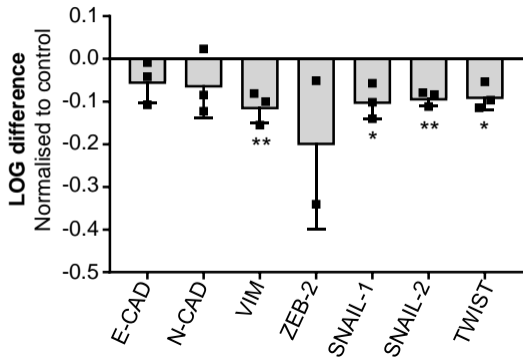

Supplement: 12885_2019_5819_MOESM7_ESM.pdf [file 12885_2019_5819_MOESM7_ESM.pdf]
