# Supplementary material for: miR-221-5p regulates proliferation and migration in human prostate cancer cells and reduces tumor growth in vivo
Source: Springer Nature journal article supplement (doi:10.1186/s12885-019-5819-6), 2019-06-25

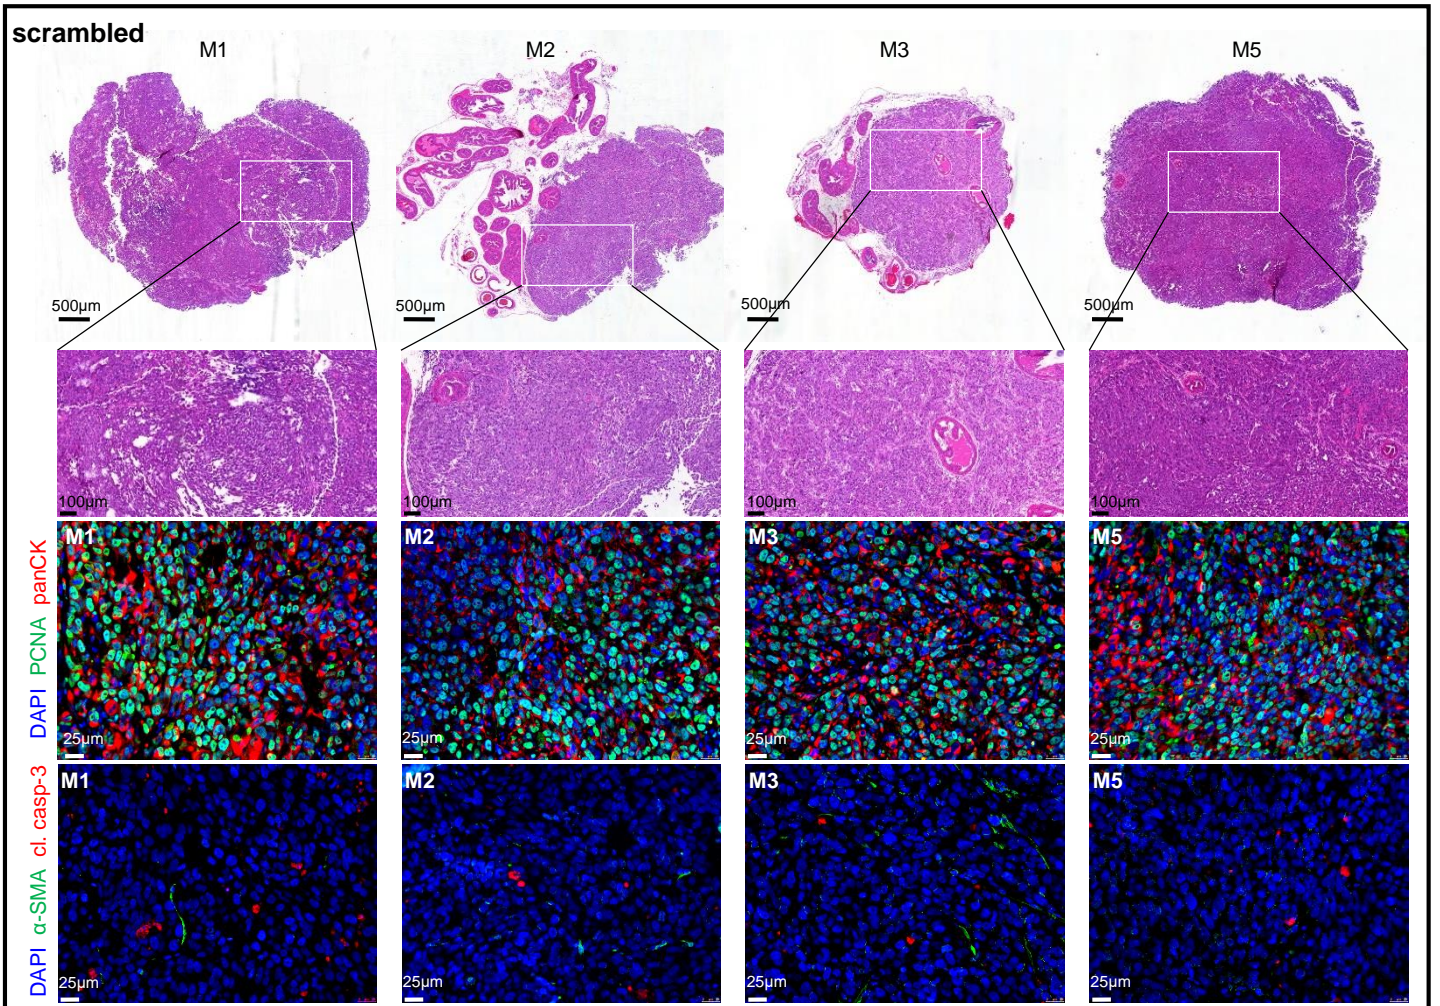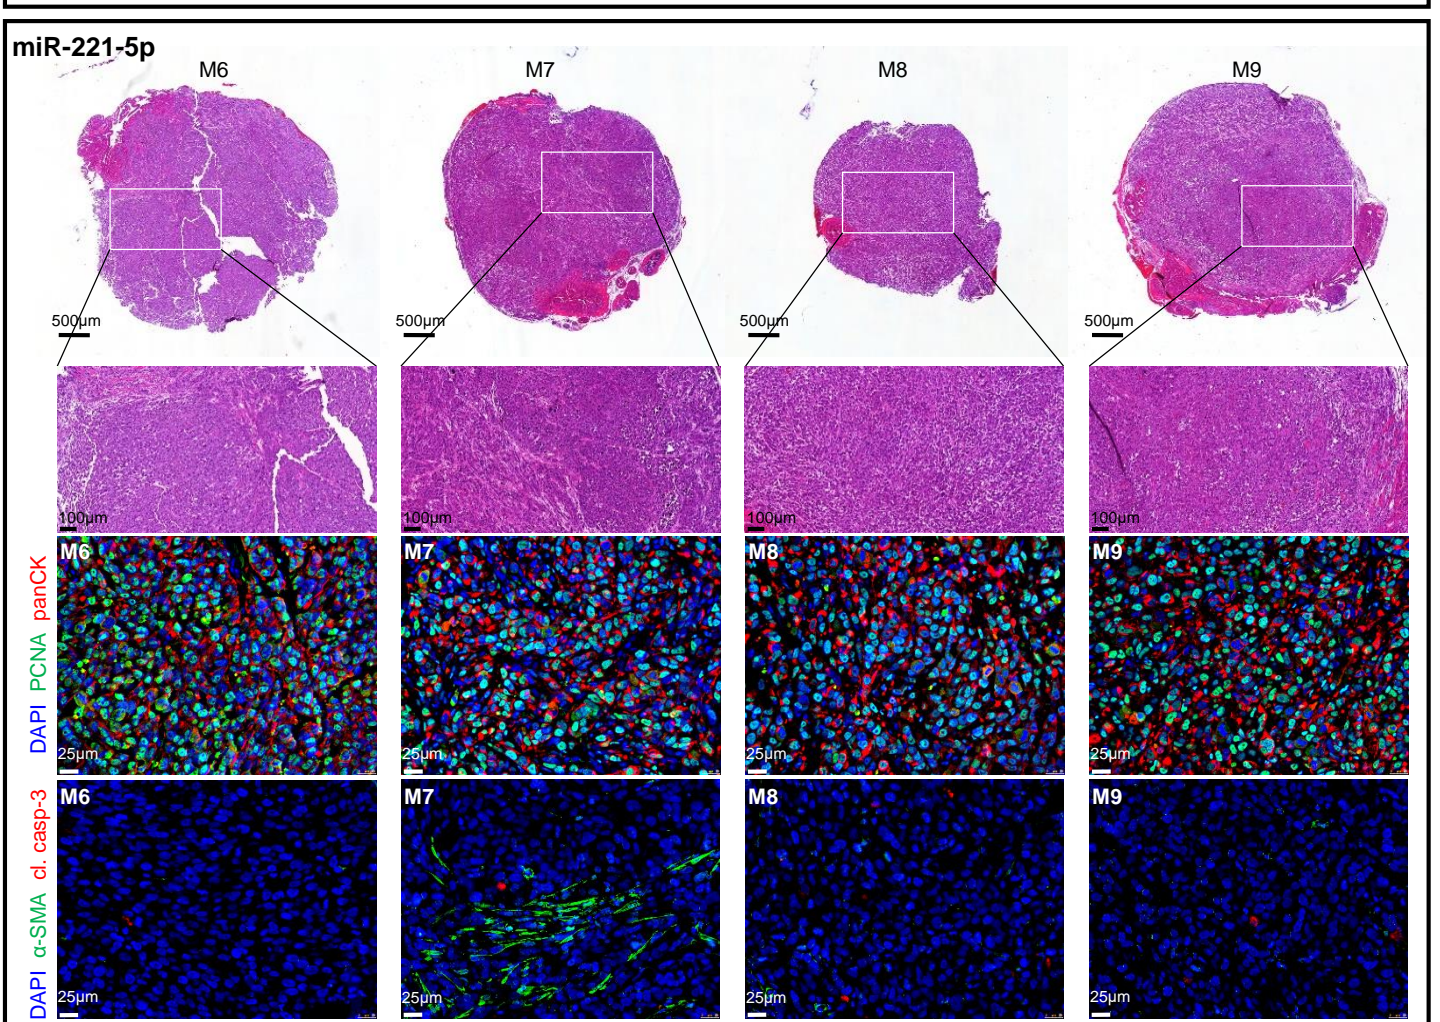

Supplement: MOESM6 [file 16852618]
